# Supplementary material for: Effect of Plastic Mulching on Soil Carbon and Nitrogen Cycling-Related Bacterial Community Structure and Function in a Dryland Spring Maize Field
Source: MDPI journal article supplement (doi:10.3390/agriculture11111040), 2021-10-23
Supplement: s1 [file s1]

## Supplementary material

**Table S1.** The physical and chemical properties of the maize soil under different treatments.

| Treat-<br>ment | STN<br>(g·kg <sup>-1</sup> ) | PNM<br>(mg·kg <sup>-1</sup> ) | MBN<br>(mg·kg <sup>-1</sup> ) | NO <sub>3</sub> <sup>-</sup> -N<br>(mg·kg <sup>-1</sup> ) | NH <sub>4</sub> <sup>+</sup> -N<br>(mg·kg <sup>-1</sup> ) | SOC<br>(g·kg <sup>-1</sup> ) | MBC<br>(mg·kg <sup>-1</sup> ) |
|----------------|------------------------------|-------------------------------|-------------------------------|-----------------------------------------------------------|-----------------------------------------------------------|------------------------------|-------------------------------|
| NM             | 1.31a                        | 27.15a                        | 31.32b                        | 0.47a                                                     | 2.64a                                                     | 10.58a                       | 273b                          |
| PM             | 1.31a                        | 25.79a                        | 34.36a                        | 0.54a                                                     | 2.74a                                                     | 10.39a                       | 273b                          |
| BL             | 1.26a                        | 22.13a                        | 35.14a                        | 0.43a                                                     | 2.81a                                                     | 10.45a                       | 366a                          |

CK, non-mulched spring maize (control); PM, plastic-mulched spring maize; BL, bareland fallow. Values are mean ± SD (n = 3). Letters followed by different numbers within a column are significantly different at *p* < 0.05.

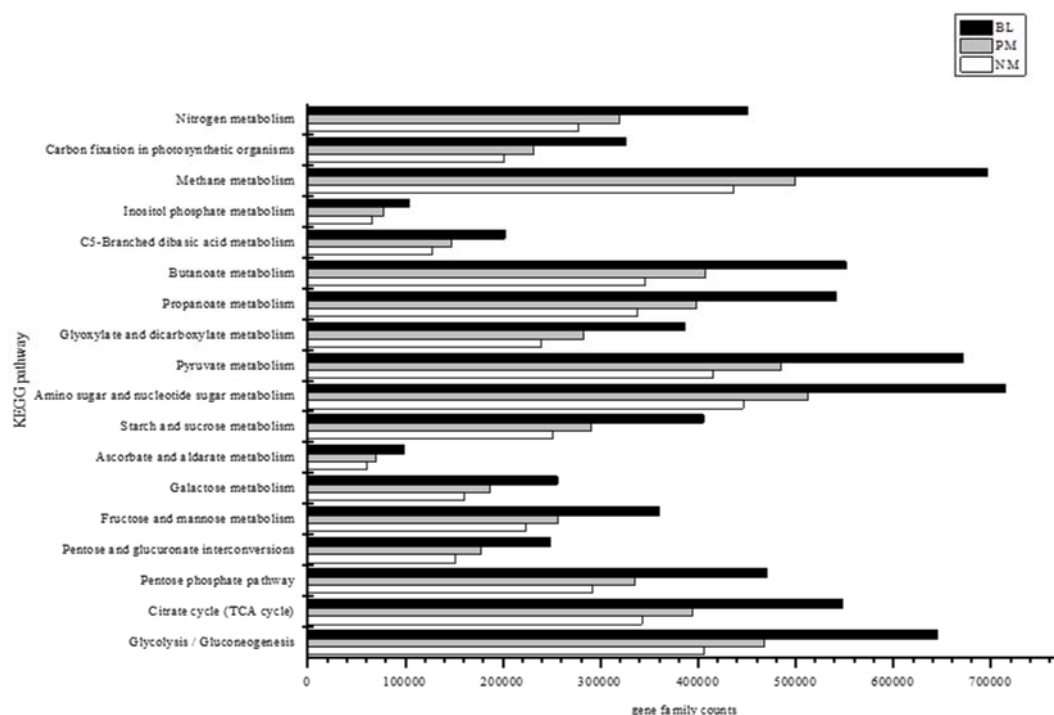

**Figure S1.** KEGG annotated carbon and nitrogen metabolic pathways of soil bacteria in a dryland field with three different treatments. NM: non-mulched spring maize (control); PM: plastic-mulched spring maize; BL: bareland fallow. n = 3 (NM, PM, BL).
